# Supplementary material
Source: publisher figshare collection journal article supplement (https://scielo.figshare.com/articles/dataset/_/6388250)
Supplement: Supplementary file 1 [file Table_1.xls]

## Sheet: Table_1
<b>Groups</b>	<b>Number of defecations (pellets/d)</b>	<b>Dry weight of feces (mg/pellet)</b>	<b>Intestinal transit time (min)</b>
Control (n=15)	41.4±5.4	145.8±21.7	408.8±64.9
STC (n=30)	24.8±5.7	193.1±15.8	515.5±100.2
<em>t</em> value	6.667	5.576	2.826
P value	0.000	0.000	0.011
