# Supplementary material
Source: publisher figshare collection journal article supplement (https://scielo.figshare.com/articles/dataset/_/6388250)
Supplement: Supplementary file 2 [file Table_2.xls]

## Sheet: Table_2
<b>Groups</b>	<b>Number of defecations (pellets/d)</b>	<b>Dry weight of feces (mg/pellet)</b>	<b>Intestinal transit time (min)</b>
Control (n=15)	45.3±8.0	126.6±17.7	358.2±47.7
STC (n=15)	25.9±5.8	172.3±15.8	496.8±65.1
STC bisacodyl (n=15)	37.2±5.4*	151.1±9.3*	415.4±48.2*
<em>t</em> value	17.60	21.94	15.27
P value	0.000	0.000	0.000
